# Supplementary material for: Large-scale gene expression changes in APP/PSEN1 and GFAP mutation models exhibit high congruence with Alzheimer’s disease
Source: PubMed Central journal article supplement (PMC10796008; doi:10.1371/journal.pone.0291995), 2024-01-18

ALZHEIMER DISEASE

■ = both models

★ = GFAP model only and AD portrait

★ = APP/PS1 model only and AD portrait

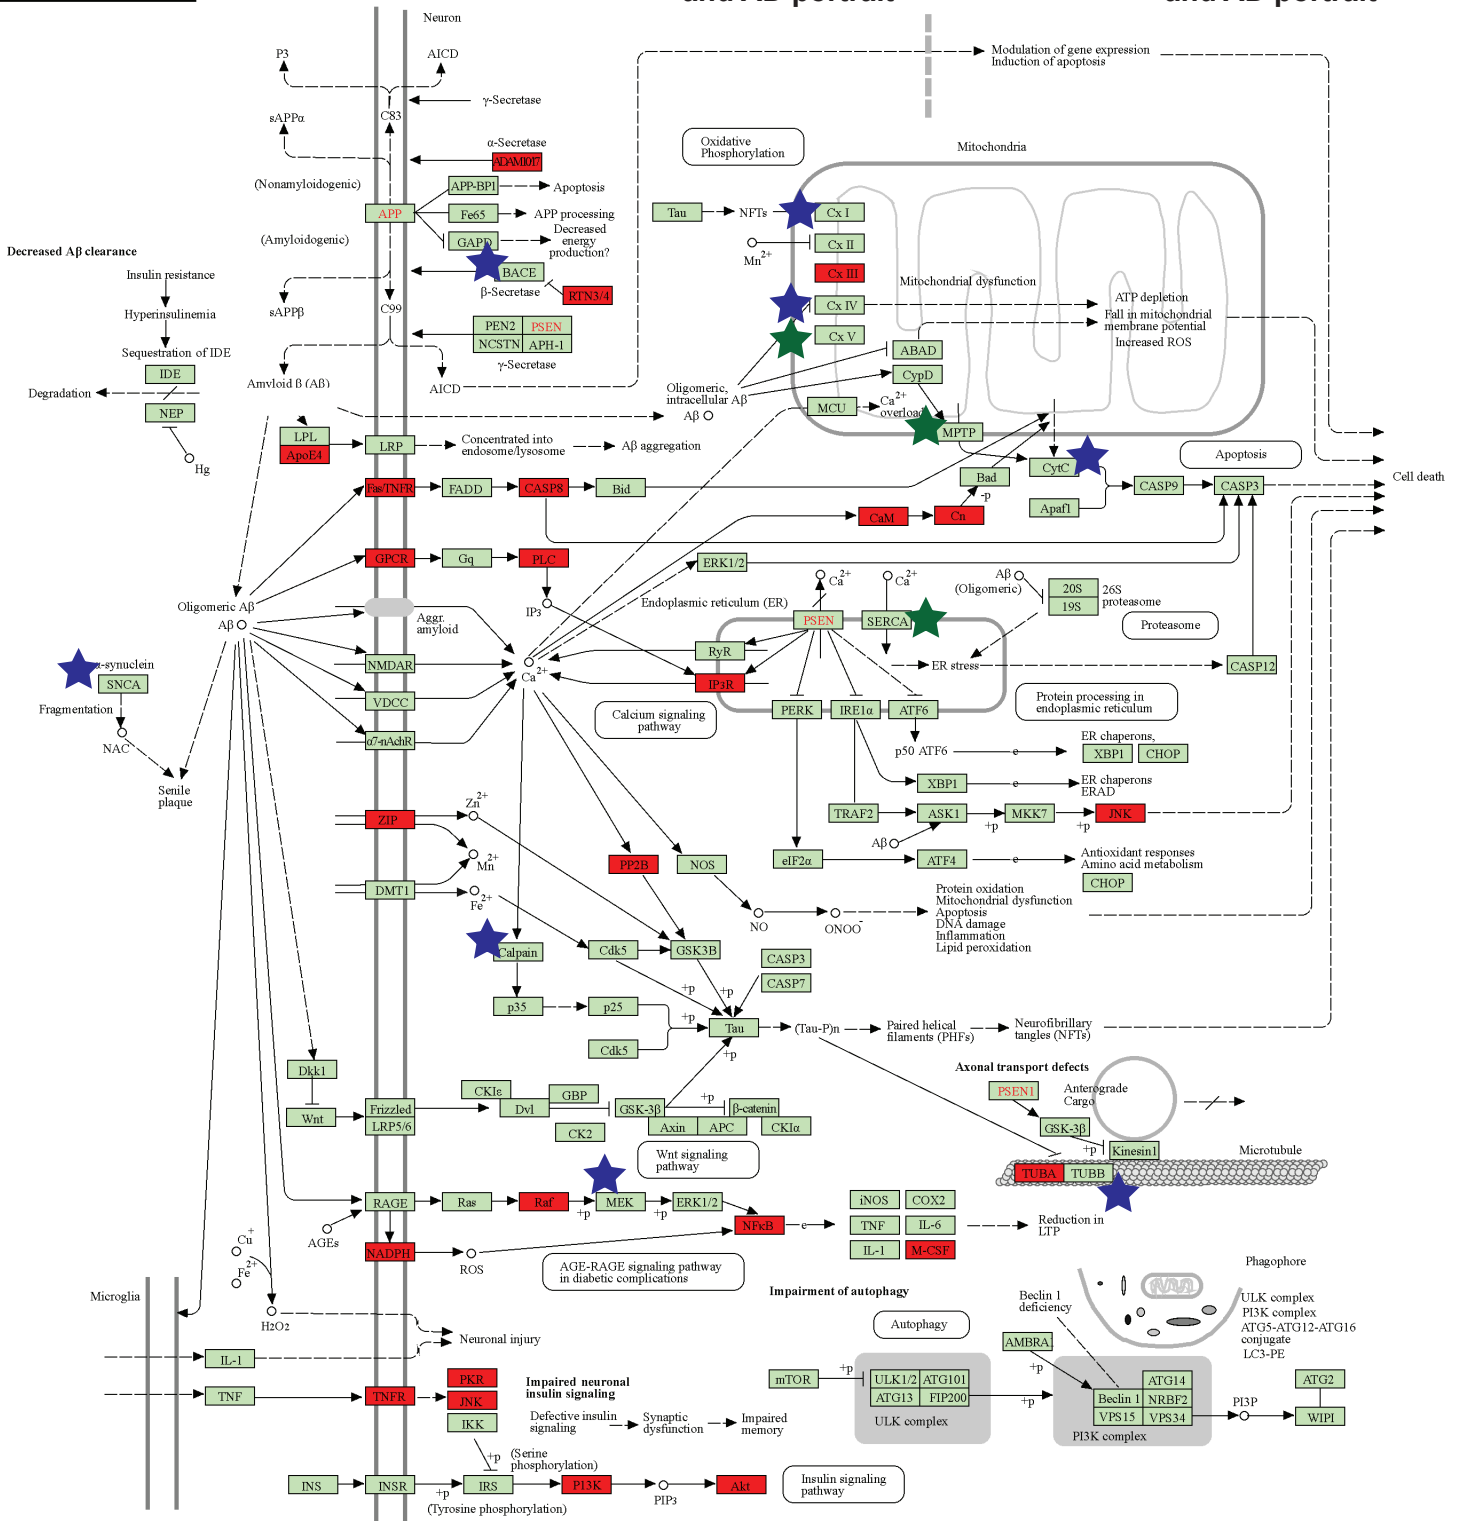

Supplement: pone.0291995.s001.pdf [file pone.0291995.s001.pdf]
